# Supplementary material for: Effectiveness of two types of palliative home care in cancer and non-cancer patients: A retrospective population-based study using claims data
Source: PubMed Central journal article supplement — Palliat Med. 2021 Jun 6;35(6):1158–69. doi: 10.1177/02692163211013666 (PMC8189010; doi:10.1177/02692163211013666), 2021-06-06
Supplement: sj-pdf-1-pmj-10.1177_02692163211013666.pdf [file sj-pdf-1-pmj-10.1177_02692163211013666.pdf]

1 **eSupplement**

2 **Effectiveness of two types of palliative homecare in cancer and non-cancer**  
3 **patients: a retrospective population-based study using claims data**

4

5 Authors and affiliations

6 Krause, Markus; Jena University Hospital, Institute of General Practice and Family Medicine  
7 Ditscheid, Bianka; Jena University Hospital, Institute of General Practice and Family Medicine  
8 Lehmann, Thomas; Jena University Hospital, Center for Clinical Studies  
9 Jansky, Maximiliane; University Medical Center Göttingen, Clinic for Palliative Medicine  
10 Marschall, Ursula; BARMER  
11 Meißner, Winfried; Jena University Hospital, Department of Palliative Medicine  
12 Nauck, Friedemann; University Medical Center Göttingen, Clinic for Palliative Medicine  
13 Wedding, Ulrich; Jena University Hospital, Department of Palliative Care  
14 Freytag, Antje; Jena University Hospital, Institute of General Practice and Family Medicine  
15 for the SAVOIR Study Group; Jena University Hospital

16 Content

17 eMethods

18 Identification of primary palliative care and specialized palliative homecare

19 Linked items of claims data used

20 30 day observation period

21 eResults & eDiscussion

22 30 day observation period

23 Covariates and interactions

24 References

25 Abbreviations

## 26 eMethods

### 27 eTable1: Assignment of cancer or non-cancer

| Disease                                                    | ICD-10 code                           |
|------------------------------------------------------------|---------------------------------------|
| <b>Cancer</b>                                              | C00*-C97*                             |
| <b>Gastrointestinal cancer or corresponding metastases</b> | C15*-C26*, C78.4-C78.8                |
| <b>Non-cancer</b>                                          |                                       |
| <b>Cardiovascular diseases</b>                             | I0*-I6*                               |
| <b>Heart failure</b>                                       | I50*                                  |
| <b>Cerebrovascular diseases</b>                            | I60*-I69*                             |
| <b>Kidney diseases</b>                                     | N17*-N18*, N28*, I12*-I13*            |
| <b>Liver diseases</b>                                      | K70*-K77*                             |
| <b>Respiratory diseases</b>                                | J09*-J18*, J20*-J22*, J40*-J47*, J96* |
| <b>Neurodegenerative diseases</b>                          | G10*, G20*, G35*, G122*, G231-G233*   |
| <b>Alzheimer's disease and dementia, senility</b>          | F00*-F03*, G30*, R54*                 |
| <b>HIV disease</b>                                         | B20*-B24*                             |

### 28 Identification of primary palliative care and specialized palliative homecare

29 Primary palliative care was identified via the fee schedule items (GOP) of the Uniform Value Scale  
30 (EBM): 03370/04370, 03371/04371, 03372/04372, 03373. Only general practitioners and pediatricians  
31 can bill these items. Fee schedule items for specialists such as oncologists or additional items by  
32 regional Associations of Statutory Health Insurance Physicians (KV) or selective-contracting were  
33 extensively researched and used to identify primary palliative care. Specialized palliative homecare  
34 was identified via the GOP: 01425, 01426. Items by regional Associations of Statutory Health Insurance  
35 Physicians (KV) or selective-contracting with billing of service were extensively researched to identify  
36 specialized palliative homecare. If both, specialized palliative homecare and primary palliative care,  
37 have been carried out, the assignment was made to specialized palliative homecare, since specialized  
38 palliative homecare compared to primary palliative care is the more comprehensive type of palliative  
39 homecare.

### 40 Linked items of claims data used

41 Access to the data was provided from October 2018. Via protected gateway the health insurance fund  
42 BARMER provided access to the scientific data warehouse to create the study population, to prepare  
43 and analyze the data. Plausibility checks were performed during data preparation. This revealed that  
44 services were billed after the date of death, which were included for the present analyses. For further  
45 information, we refer to the publication of Ditscheid and Storch et al<sup>1</sup>. The claims data used included  
46 demographic information (for example gender, age, date of death), outpatient and hospital diagnoses  
47 (10th revision of the International Statistical Classification of Diseases and Related Health Problems  
48 [ICD-10]), outpatient procedures (fee schedule items [GOP]) as well as hospital procedure codes  
49 (German version of the International Classification of Procedures in Medicine [OPS]) and outpatient  
50 drug prescriptions (Anatomical Therapeutic Chemical Code [ATC] or Central Pharmaceutical Number  
51 [PZN]). The different elements were linked using an individual but pseudonymous identifier.

### 52 30 day observation period

53 We added the observation period of 30 days to enhance the comparability to other studies<sup>2-4</sup>. To  
54 ensure that palliative care could have an impact on the indicators presented, palliative care had to be  
55 documented at least once before the observation period of 30 days before death. The chosen  
56 healthcare indicators were calculated for the observation periods of 30 days before death.

57 **eResults & eDiscussion**

58 **30 day observation period**

59 From a total of 95,962 individuals deceased in 2016, 14,685 patients were included in the analysis of  
60 the 30 day observation period (*eFigure 1*). That means in summary, 2,150 fewer patients within  
61 primary palliative care and 2,071 fewer patients within specialized palliative care compared to the  
62 observation period of 14 days. The lower number of patients in the observation period of 30 days is  
63 due to the fact that palliative care had to be documented at least once before the respective  
64 observation and palliative homecare in general as well as specialized palliative homecare in particular  
65 started late before death (in our population, specialized palliative homecare in median 21 days before  
66 death).

67 There were no relevant differences in patient characteristics between patients included for the  
68 observation periods of 14 and 30 days before death (*eTable 2*). Compared to the observation period  
69 of 14 days, similar results were observed within 30 days before death (*eTable 3*), except for  
70 insertion/change of PEG. Here, the analysis of the interaction was not feasible for the 30-day  
71 observation period due to the small number of patients within specialized palliative homecare.

72 In summary, the benefit of the more comprehensive specialized palliative homecare was evident in  
73 both observation periods, 30 and 14 days before death as well as in both subgroups of cancer and non-  
74 cancer patients.

75 **Covariates and interactions**

76 For results on covariates and interactions, see *eTable 4a* to *eTable 8b*: Older age, followed by living in  
77 a nursing home and the non-diagnosis of cancer seemed to be factors associated with a lower rate of  
78 potentially aggressive interventions at the end-of-life. In contrast, risk factors appeared to be high  
79 comorbidity, male gender and living in rural areas. For the latter, similar results were reported in other  
80 studies concerning the indicators chemotherapy<sup>5</sup> and artificial nutrition<sup>6</sup> at the end-of-life. The impact  
81 of the two types of palliative homecare as well as the presence or absence of cancer are main findings  
82 and therefore reported in the main paper.

83

84 *eFigure 1: Flow-Chart Study population, 30 days before death*

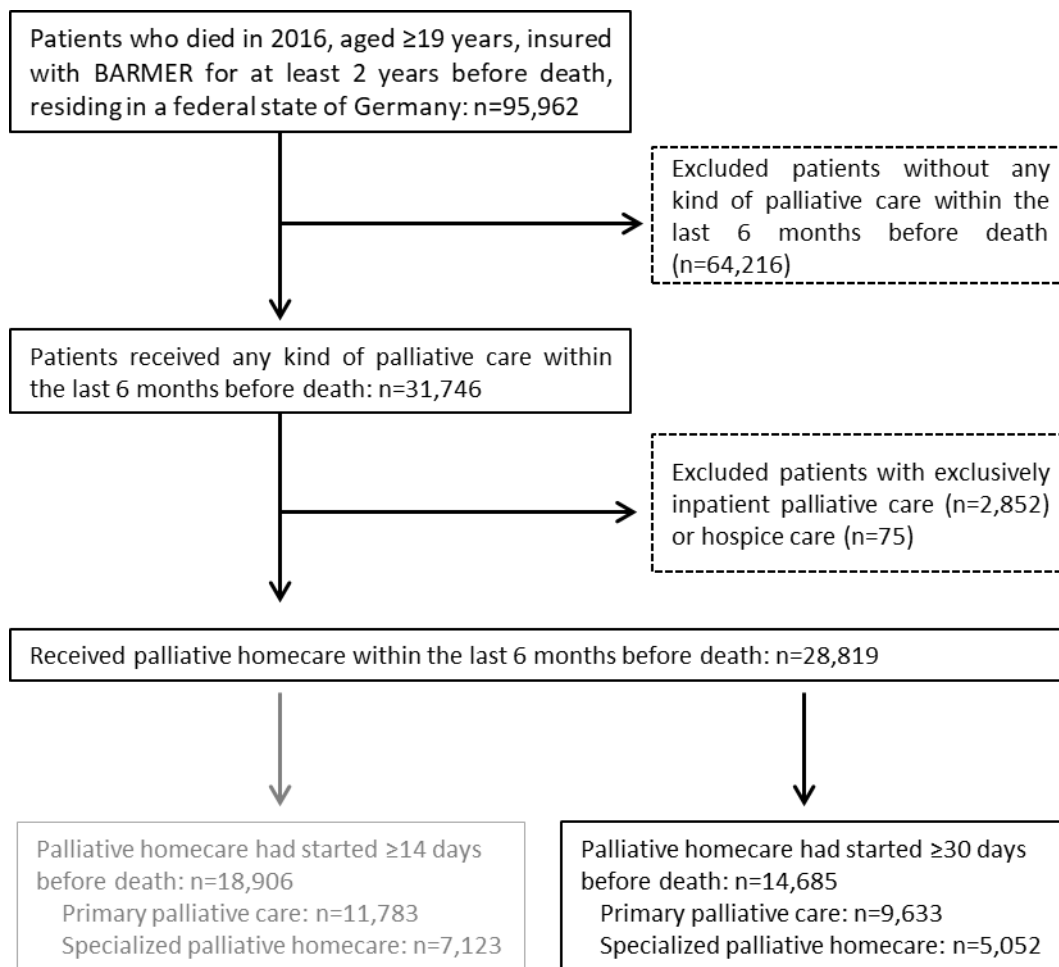

85 .

1 **eTable 2: Patients' characteristics, 30 days before death**

|                                                                                                            | Primary palliative care |              |               | Specialized palliative homecare |               |               | Total         |               |               | Primary palliative care vs. Specialized palliative homecare |         |
|------------------------------------------------------------------------------------------------------------|-------------------------|--------------|---------------|---------------------------------|---------------|---------------|---------------|---------------|---------------|-------------------------------------------------------------|---------|
|                                                                                                            | All                     | Non-cancer   | Cancer        | All                             | Non-cancer    | Cancer        | All           | Non-cancer    | Cancer        | MD or PP                                                    | p-Value |
| <b>Patients receiving palliative homecare 30 days before death</b>                                         |                         |              |               |                                 |               |               |               |               |               |                                                             |         |
| n                                                                                                          | 9,633                   | 4,101        | 5,532         | 5,052                           | 726           | 4,326         | 14,685        | 4,827         | 9,858         |                                                             |         |
| %                                                                                                          | 65.60                   | 42.57        | 57.43         | 34.40                           | 14.37         | 85.63         | 100.00        | 32.87         | 67.13         |                                                             | p<.0001 |
| <b>Patients without gastrointestinal cancer or corresponding metastases</b>                                |                         |              |               |                                 |               |               |               |               |               |                                                             |         |
| n                                                                                                          | 7,018                   | 4,101        | 2,917         | 2,656                           | 726           | 1,930         | 9,674         | 4,827         | 4,847         |                                                             |         |
| % of All                                                                                                   | 72.85                   | 58.44        | 41.56         | 52.57                           | 27.33         | 72.67         | 100.00        | 49.90         | 50.10         | 20.28                                                       | p<.0001 |
| <b>Age in years</b>                                                                                        |                         |              |               |                                 |               |               |               |               |               |                                                             |         |
| Mean (SD)                                                                                                  | 80.90 (11.40)           | 85.90 (9.27) | 77.18 (11.41) | 74.05 (12.45)                   | 80.95 (13.33) | 72.89 (11.92) | 78.54 (12.21) | 85.16 (10.14) | 75.30 (11.83) | 6.85                                                        | p<.0001 |
| <b>Female gender</b>                                                                                       |                         |              |               |                                 |               |               |               |               |               |                                                             |         |
| n                                                                                                          | 5,863                   | 2,916        | 2,947         | 2,972                           | 463           | 2,509         | 8,835         | 3,379         | 5,456         |                                                             |         |
| %                                                                                                          | 60.86                   | 49.74        | 30.59         | 58.83                           | 15.58         | 84.42         | 60.16         | 38.25         | 61.75         | 2.03                                                        | p=.0174 |
| <b>Morbidity weight, CCI</b>                                                                               |                         |              |               |                                 |               |               |               |               |               |                                                             |         |
| Mean (SD)                                                                                                  | 5.47 (3.80)             | 3.75 (2.61)  | 6.74 (4.03)   | 6.56 (4.03)                     | 3.79 (2.72)   | 7.03 (4.03)   | 5.85 (3.91)   | 3.76 (2.63)   | 6.87 (4.03)   | -1.09                                                       | p<.0001 |
| <b>Nursing home resident</b>                                                                               |                         |              |               |                                 |               |               |               |               |               |                                                             |         |
| n                                                                                                          | 4,162                   | 2,528        | 1,634         | 1,677                           | 387           | 1,290         | 5,839         | 2,915         | 2,924         |                                                             |         |
| %                                                                                                          | 43.21                   | 60.74        | 39.26         | 33.19                           | 23.08         | 76.29         | 39.76         | 49.92         | 50.08         | 10.02                                                       | p<.0001 |
| <b>Residency, urban</b>                                                                                    |                         |              |               |                                 |               |               |               |               |               |                                                             |         |
| (missing: Primary palliative care n=372, Specialized palliative homecare n=191) n                          | 6,574                   | 2,898        | 3,676         | 3,467                           | 564           | 2,903         | 10,041        | 3,462         | 6,579         |                                                             |         |
| %                                                                                                          | 70.99                   | 44.08        | 55.92         | 71.32                           | 16.27         | 83.73         | 71.10         | 34.48         | 65.52         | -0.33                                                       | p=.6816 |
| CCI Charlson Comorbidity Index; MD mean difference; PP percentage points difference; SD standard deviation |                         |              |               |                                 |               |               |               |               |               |                                                             |         |

2

3

4 **eTable 3: Healthcare indicators, 30 days before death**

|                                                                                                                                             | Primary palliative care |                      |                     | Specialized palliative homecare |                      |                     | Total  |            |        | Primary palliative care vs. Specialized palliative homecare |                                                                                                           |
|---------------------------------------------------------------------------------------------------------------------------------------------|-------------------------|----------------------|---------------------|---------------------------------|----------------------|---------------------|--------|------------|--------|-------------------------------------------------------------|-----------------------------------------------------------------------------------------------------------|
|                                                                                                                                             | All                     | Non-cancer           | Cancer              | All                             | Non-cancer           | Cancer              | All    | Non-cancer | Cancer | PP                                                          | p-Value                                                                                                   |
| <b>Patients receiving palliative homecare 30 days before death</b>                                                                          |                         |                      |                     |                                 |                      |                     |        |            |        |                                                             |                                                                                                           |
| n                                                                                                                                           | 9,633                   | 4,101                | 5,532               | 5,052                           | 726                  | 4,326               | 14,685 | 4,827      | 9,858  |                                                             |                                                                                                           |
| %                                                                                                                                           | 65.60                   | 42.57                | 57.43               | 34.40                           | 14.37                | 85.63               | 100.00 | 32.87      | 67.13  |                                                             |                                                                                                           |
| <b>Place of death, hospital</b>                                                                                                             |                         |                      |                     |                                 |                      |                     |        |            |        |                                                             |                                                                                                           |
| n                                                                                                                                           | 3,558                   | 994                  | 2,564               | 980                             | 66                   | 914                 | 4,538  | 1,060      | 3,478  | 17.54                                                       | p<.0001                                                                                                   |
| %                                                                                                                                           | 36.94                   | 24.24                | 46.35               | 19.40                           | 9.09                 | 21.13               | 30.90  | 21.96      | 35.28  |                                                             |                                                                                                           |
| Odds ratio primary palliative care vs. specialized palliative homecare [CI]                                                                 |                         |                      | 4.337 [3.943-4.771] |                                 |                      |                     |        |            |        |                                                             |                                                                                                           |
| Odds ratio non-cancer, primary palliative care vs. specialized palliative homecare [CI]                                                     |                         | 5.069 [3.820-6.725]  |                     |                                 | 5.069 [3.820-6.725]  |                     |        |            |        |                                                             |                                                                                                           |
| Odds ratio cancer, primary palliative care vs. specialized palliative homecare [CI]                                                         |                         |                      | 4.255 [3.847-4.705] |                                 |                      | 4.255 [3.847-4.705] |        |            |        |                                                             | Interaction primary palliative care vs. specialized palliative homecare and non-cancer vs. cancer p=.2485 |
| <b>Hospital care</b>                                                                                                                        |                         |                      |                     |                                 |                      |                     |        |            |        |                                                             |                                                                                                           |
| n                                                                                                                                           | 4,006                   | 1,210                | 2,796               | 1,356                           | 101                  | 1,255               | 5,362  | 1,311      | 4,051  | 14.75                                                       | p<.0001                                                                                                   |
| %                                                                                                                                           | 41.59                   | 29.50                | 50.54               | 26.84                           | 13.91                | 29.01               | 36.51  | 27.16      | 41.09  |                                                             |                                                                                                           |
| Odds ratio primary palliative care vs. specialized palliative homecare [CI]                                                                 |                         |                      | 3.025 [2.776-3.296] |                                 |                      |                     |        |            |        |                                                             |                                                                                                           |
| Odds ratio non-cancer, primary palliative care vs. specialized palliative homecare [CI]                                                     |                         | 3.403 [2.699-4.291]  |                     |                                 | 3.403 [2.699-4.291]  |                     |        |            |        |                                                             | Interaction primary palliative care vs. specialized palliative homecare and non-cancer vs. cancer p=.2806 |
| Odds ratio cancer, primary palliative care vs. specialized palliative homecare [CI]                                                         |                         |                      | 2.970 [2.710-3.256] |                                 |                      | 2.970 [2.710-3.256] |        |            |        |                                                             |                                                                                                           |
| <b>Intensive care treatment</b>                                                                                                             |                         |                      |                     |                                 |                      |                     |        |            |        |                                                             |                                                                                                           |
| n                                                                                                                                           | 571                     | 212                  | 359                 | 77                              | 15                   | 62                  | 648    | 227        | 421    | 4.41                                                        | p<.0001                                                                                                   |
| %                                                                                                                                           | 5.93                    | 5.17                 | 6.49                | 1.52                            | 2.07                 | 1.43                | 4.41   | 4.70       | 4.27   |                                                             |                                                                                                           |
| Odds ratio primary palliative care vs. specialized palliative homecare [CI]                                                                 |                         |                      | 4.899 [3.812-6.295] |                                 |                      |                     |        |            |        |                                                             |                                                                                                           |
| Odds ratio non-cancer, primary palliative care vs. specialized palliative homecare [CI]                                                     |                         | 3.416 [1.996-5.849]  |                     |                                 | 3.416 [1.996-5.849]  |                     |        |            |        |                                                             | Interaction primary palliative care vs. specialized palliative homecare and non-cancer vs. cancer p=.1515 |
| Odds ratio cancer, primary palliative care vs. specialized palliative homecare [CI]                                                         |                         |                      | 5.313 [4.015-7.030] |                                 |                      | 5.313 [4.015-7.030] |        |            |        |                                                             |                                                                                                           |
| <b>Chemotherapy</b>                                                                                                                         |                         |                      |                     |                                 |                      |                     |        |            |        |                                                             |                                                                                                           |
| Cancer patients                                                                                                                             |                         |                      | 5,532               |                                 |                      | 4,326               |        |            | 9,858  |                                                             |                                                                                                           |
| n                                                                                                                                           |                         |                      | 752                 |                                 |                      | 366                 |        |            | 1,118  |                                                             |                                                                                                           |
| %                                                                                                                                           |                         |                      | 13.59               |                                 |                      | 8.46                |        |            | 11.34  | 5.13                                                        | p<.0001                                                                                                   |
| Odds ratio primary palliative care vs. specialized palliative homecare [CI]                                                                 |                         |                      | 2.173 [1.883-2.507] |                                 |                      |                     |        |            |        |                                                             |                                                                                                           |
| <b>Parenteral nutrition</b>                                                                                                                 |                         |                      |                     |                                 |                      |                     |        |            |        |                                                             |                                                                                                           |
| Patients without gastrointestinal cancer or corresponding metastases                                                                        | 7,018                   | 4,101                | 2,917               | 2,656                           | 726                  | 1,930               | 9,674  | 4,827      | 4,847  |                                                             |                                                                                                           |
| n                                                                                                                                           | 68                      | 21                   | 47                  | 73                              | 2                    | 71                  | 141    | 23         | 118    |                                                             |                                                                                                           |
| %                                                                                                                                           | 0.97                    | 0.51                 | 1.61                | 2.75                            | 0.28                 | 3.68                | 1.46   | 0.48       | 2.43   | -1.78                                                       | p<.0001                                                                                                   |
| Odds ratio primary palliative care vs. specialized palliative homecare [CI]                                                                 |                         |                      | 0.668 [0.466-0.960] |                                 |                      |                     |        |            |        |                                                             |                                                                                                           |
| Odds ratio non-cancer, primary palliative care vs. specialized palliative homecare [CI]                                                     |                         | 3.131 [0.716-13.687] |                     |                                 | 3.131 [0.716-13.687] |                     |        |            |        |                                                             | Interaction primary palliative care vs. specialized palliative homecare and non-cancer vs. cancer p=.0264 |
| Odds ratio cancer other than gastrointestinal or corresponding metastases, primary palliative care vs. specialized palliative homecare [CI] |                         |                      | 0.561 [0.378-0.831] |                                 |                      | 0.561 [0.378-0.831] |        |            |        |                                                             |                                                                                                           |
| <b>Insertion or change of a PEG</b>                                                                                                         |                         |                      |                     |                                 |                      |                     |        |            |        |                                                             |                                                                                                           |
| Patients without gastrointestinal cancer or corresponding metastases                                                                        | 7,018                   | 4,101                | 2,917               | 2,656                           | 726                  | 1,930               | 9,674  | 4,827      | 4,847  |                                                             |                                                                                                           |
| n                                                                                                                                           | 50                      | 27                   | 23                  | 7                               | 0                    | 7                   | 57     | 27         | 30     |                                                             |                                                                                                           |
| %                                                                                                                                           | 0.71                    | 0.66                 | 0.79                | 0.26                            | 0.00                 | 0.36                | 0.59   | 0.56       | 0.62   | 0.45                                                        | p=.0100                                                                                                   |
| Odds ratio primary palliative care vs. specialized palliative homecare [CI]                                                                 |                         |                      | 3.702 [1.632-8.396] |                                 |                      |                     |        |            |        |                                                             |                                                                                                           |
| Odds ratio non-cancer, primary palliative care vs. specialized palliative homecare [CI]                                                     |                         | not calculable       |                     |                                 | not calculable       |                     |        |            |        |                                                             | Interaction primary palliative care vs. specialized palliative homecare and non-cancer vs. cancer p=.9463 |
| Odds ratio cancer other than gastrointestinal or corresponding metastases, primary palliative care vs. specialized palliative homecare [CI] |                         |                      | 2.610 [1.105-6.167] |                                 |                      | 2.610 [1.105-6.167] |        |            |        |                                                             |                                                                                                           |

CI confidence interval; PEG Percutaneous Endoscopic Gastrostomy; PP percentage points difference; SD standard deviation

5

6

1 *eTable 4a: Place of death, 14 days*

| Analysis: maximum likelihood estimators, 14 days                                              |           |                |                 |            |
|-----------------------------------------------------------------------------------------------|-----------|----------------|-----------------|------------|
| Parameter                                                                                     | Estimator | Standard error | Wald Chi-square | Pr > ChiSq |
| Intercept                                                                                     | 0.9363    | 0.1290         | 52.6461         | <.0001     |
| Age                                                                                           | -0.0307   | 0.00164        | 347.9092        | <.0001     |
| Male vs. female sex                                                                           | 0.00927   | 0.0372         | 0.0622          | 0.8030     |
| Comorbidity index                                                                             | 0.0268    | 0.00488        | 30.1742         | <.0001     |
| Nursing home resident vs. non-nursing home resident                                           | -1.6070   | 0.0454         | 1252.6846       | <.0001     |
| Rural vs. urban residency                                                                     | -0.00564  | 0.0394         | 0.0205          | 0.8863     |
| Cancer vs. non-cancer                                                                         | -0.4999   | 0.1232         | 16.4677         | <.0001     |
| Primary palliative care vs. specialized palliative homecare                                   | 1.4895    | 0.0450         | 1096.1140       | <.0001     |
| Interaction cancer / non-cancer vs. primary palliative care / specialized palliative homecare | 0.2053    | 0.1302         | 2.4848          | 0.1150     |

2 *eTable 4b: Place of death, 30 days*

| Analysis: maximum likelihood estimators, 30 days                                              |           |                |                 |            |
|-----------------------------------------------------------------------------------------------|-----------|----------------|-----------------|------------|
| Parameter                                                                                     | Estimator | Standard error | Wald Chi-square | Pr > ChiSq |
| Intercept                                                                                     | 0.9357    | 0.1450         | 41.6543         | <.0001     |
| Age                                                                                           | -0.0301   | 0.00184        | 267.2770        | <.0001     |
| Male vs. female sex                                                                           | 0.00787   | 0.0418         | 0.0355          | 0.8506     |
| Comorbidity index                                                                             | 0.0293    | 0.00552        | 28.1406         | <.0001     |
| Nursing home resident vs. non-nursing home resident                                           | -1.6017   | 0.0502         | 1017.8512       | <.0001     |
| Rural vs. urban residency                                                                     | -0.0207   | 0.0443         | 0.2174          | 0.6410     |
| Cancer vs. non-Cancer                                                                         | -0.4359   | 0.1445         | 9.0960          | 0.0026     |
| Primary palliative care vs. specialized palliative homecare                                   | 1.4480    | 0.0513         | 795.6813        | <.0001     |
| Interaction cancer / non-cancer vs. primary palliative care / specialized palliative homecare | 0.1751    | 0.1517         | 1.3319          | 0.2485     |

3 *eTable 5a: Hospital care, 14 days*

| Analysis: maximum likelihood estimators, 14 days                                              |           |                |                 |            |
|-----------------------------------------------------------------------------------------------|-----------|----------------|-----------------|------------|
| Parameter                                                                                     | Estimator | Standard error | Wald Chi-square | Pr > ChiSq |
| Intercept                                                                                     | -0.1309   | 0.1326         | 0.9753          | 0.3234     |
| Age                                                                                           | -0.0204   | 0.00168        | 148.4301        | <.0001     |
| Male vs. female sex                                                                           | 0.0711    | 0.0386         | 3.4015          | 0.0651     |
| Comorbidity index                                                                             | 0.0218    | 0.00506        | 18.6223         | <.0001     |
| Nursing home resident vs. non-nursing home resident                                           | -1.1686   | 0.0472         | 612.0085        | <.0001     |
| Rural vs. urban residency                                                                     | 0.1361    | 0.0405         | 11.3118         | 0.0008     |
| Cancer vs. non-cancer                                                                         | -0.2848   | 0.1191         | 5.7185          | 0.0168     |
| Primary palliative care vs. specialized palliative homecare                                   | 0.9831    | 0.0463         | 451.2910        | <.0001     |
| Interaction cancer / non-cancer vs. primary palliative care / specialized palliative homecare | 0.1355    | 0.1268         | 1.1403          | 0.2856     |

4

5 *eTable 5b: Hospital care, 30 days*

| Analysis: maximum likelihood estimators, 30 days                                              |           |                |                 |            |  |
|-----------------------------------------------------------------------------------------------|-----------|----------------|-----------------|------------|--|
| Parameter                                                                                     | Estimator | Standard error | Wald Chi-square | Pr > ChiSq |  |
| Intercept                                                                                     | 0.7989    | 0.1364         | 34.3016         | <.0001     |  |
| Age                                                                                           | -0.0236   | 0.00172        | 188.0113        | <.0001     |  |
| Male vs. female sex                                                                           | 0.0844    | 0.0389         | 4.7113          | 0.0300     |  |
| Comorbidity index                                                                             | 0.0292    | 0.00516        | 31.9455         | <.0001     |  |
| Nursing home resident vs. non-nursing home resident                                           | -1.1142   | 0.0433         | 663.3395        | <.0001     |  |
| Rural vs. urban residency                                                                     | 0.0892    | 0.0411         | 4.7094          | 0.0300     |  |
| Cancer vs. non-cancer                                                                         | -0.4276   | 0.1187         | 12.9723         | 0.0003     |  |
| Primary palliative care vs. specialized palliative homecare                                   | 1.0887    | 0.0469         | 539.7866        | <.0001     |  |
| Interaction cancer / non-cancer vs. primary palliative care / specialized palliative homecare | 0.1361    | 0.1262         | 1.1642          | 0.2806     |  |

6 *eTable 6a: Intensive care treatment, 14 days*

| Analysis: maximum likelihood estimators, 14 days                                              |           |                |                 |            |  |
|-----------------------------------------------------------------------------------------------|-----------|----------------|-----------------|------------|--|
| Parameter                                                                                     | Estimator | Standard error | Wald Chi-square | Pr > ChiSq |  |
| Intercept                                                                                     | -2.6275   | 0.3051         | 74.1593         | <.0001     |  |
| Age                                                                                           | -0.0304   | 0.00362        | 70.5685         | <.0001     |  |
| Male vs. female sex                                                                           | 0.3255    | 0.0886         | 13.5007         | 0.0002     |  |
| Comorbidity index                                                                             | 0.00204   | 0.0119         | 0.0293          | 0.8641     |  |
| Nursing home resident vs. non-nursing home resident                                           | -0.9094   | 0.1129         | 64.8478         | <.0001     |  |
| Rural vs. urban residency                                                                     | -0.0354   | 0.0949         | 0.1389          | 0.7094     |  |
| Cancer vs. non-cancer                                                                         | 0.6661    | 0.3400         | 3.8386          | 0.0501     |  |
| Primary palliative care vs. specialized palliative homecare                                   | 1.9727    | 0.1574         | 157.1647        | <.0001     |  |
| Interaction cancer / non-cancer vs. primary palliative care / specialized palliative homecare | -0.3623   | 0.3509         | 1.0660          | 0.3019     |  |

7

8 *eTable 6b: Intensive care treatment, 30 days*

| Analysis: maximum likelihood estimators, 30 days                                              |           |                |                 |            |  |
|-----------------------------------------------------------------------------------------------|-----------|----------------|-----------------|------------|--|
| Parameter                                                                                     | Estimator | Standard error | Wald Chi-square | Pr > ChiSq |  |
| Intercept                                                                                     | -2.3439   | 0.2915         | 64.6610         | <.0001     |  |
| Age                                                                                           | -0.0266   | 0.00350        | 57.9046         | <.0001     |  |
| Male vs. female sex                                                                           | 0.3476    | 0.0845         | 16.9418         | <.0001     |  |
| Comorbidity index                                                                             | 0.0101    | 0.0114         | 0.7839          | 0.3759     |  |
| Nursing home resident vs. non-nursing home resident                                           | -0.9165   | 0.1070         | 73.3432         | <.0001     |  |
| Rural vs. urban residency                                                                     | -0.1503   | 0.0924         | 2.6451          | 0.1039     |  |
| Cancer vs. non-cancer                                                                         | 0.8031    | 0.2969         | 7.3193          | 0.0068     |  |
| Primary palliative care vs. specialized palliative homecare                                   | 1.6701    | 0.1429         | 136.6035        | <.0001     |  |
| Interaction cancer / non-cancer vs. primary palliative care / specialized palliative homecare | -0.4415   | 0.3079         | 2.0570          | 0.1515     |  |

9



10 *eTable 7a: Parenteral nutrition, 14 days*

| Analysis: maximum likelihood estimators, 14 days                                              |           |                |                 |            |  |
|-----------------------------------------------------------------------------------------------|-----------|----------------|-----------------|------------|--|
| Parameter                                                                                     | Estimator | Standard error | Wald Chi-square | Pr > ChiSq |  |
| Intercept                                                                                     | -0.4500   | 0.5101         | 0.7783          | 0.3777     |  |
| Age                                                                                           | -0.0428   | 0.00682        | 39.3297         | <.0001     |  |
| Male vs. female sex                                                                           | -0.2735   | 0.1910         | 2.0500          | 0.1522     |  |
| Comorbidity index                                                                             | 0.0123    | 0.0245         | 0.2505          | 0.6167     |  |
| Nursing home resident vs. non-nursing home resident                                           | -1.1781   | 0.2648         | 19.7879         | <.0001     |  |
| Rural vs. urban residency                                                                     | 0.5424    | 0.1887         | 8.2619          | 0.0040     |  |
| Cancer vs. non-cancer                                                                         | -1.5633   | 0.5239         | 8.9038          | 0.0028     |  |
| Primary palliative care vs. specialized palliative homecare                                   | -0.9989   | 0.2330         | 18.3791         | <.0001     |  |
| Interaction cancer / non-cancer vs. primary palliative care / specialized palliative homecare | 1.4389    | 0.5998         | 5.7558          | 0.0164     |  |

11 *eTable 7b: Parenteral nutrition, 30 days*

| Analysis: maximum likelihood estimators, 30 days                                              |           |                |                 |            |  |
|-----------------------------------------------------------------------------------------------|-----------|----------------|-----------------|------------|--|
| Parameter                                                                                     | Estimator | Standard error | Wald Chi-square | Pr > ChiSq |  |
| Intercept                                                                                     | 0.4239    | 0.4734         | 0.8018          | 0.3705     |  |
| Age                                                                                           | -0.0506   | 0.00642        | 62.2201         | <.0001     |  |
| Male vs. female sex                                                                           | -0.2638   | 0.1807         | 2.1307          | 0.1444     |  |
| Comorbidity index                                                                             | 0.00555   | 0.0232         | 0.0570          | 0.8114     |  |
| Nursing home resident vs. non-nursing home resident                                           | -0.7561   | 0.2227         | 11.5286         | 0.0007     |  |
| Rural vs. urban residency                                                                     | 0.3718    | 0.1811         | 4.2161          | 0.0400     |  |
| Cancer vs. non-cancer                                                                         | -2.2779   | 0.7278         | 9.7958          | 0.0017     |  |
| Primary palliative care vs. specialized palliative homecare                                   | -0.5786   | 0.2006         | 8.3190          | 0.0039     |  |
| Interaction cancer / non-cancer vs. primary palliative care / specialized palliative homecare | 1.7200    | 0.7747         | 4.9291          | 0.0264     |  |

12 *eTable 8a: Insertion or change of a PEG, 14 days*

| Analysis: maximum likelihood estimators, 14 days                                              |           |                |                 |            |  |
|-----------------------------------------------------------------------------------------------|-----------|----------------|-----------------|------------|--|
| Parameter                                                                                     | Estimator | Standard error | Wald Chi-square | Pr > ChiSq |  |
| Intercept                                                                                     | -3.9993   | 1.0096         | 15.6902         | <.0001     |  |
| Age                                                                                           | -0.0392   | 0.0116         | 11.3335         | 0.0008     |  |
| Male vs. female sex                                                                           | 0.5066    | 0.3084         | 2.6985          | 0.1004     |  |
| Comorbidity index                                                                             | 0.0172    | 0.0436         | 0.1546          | 0.6942     |  |
| Nursing home resident vs. non-nursing home resident                                           | -0.2830   | 0.3247         | 0.7595          | 0.3835     |  |
| Rural vs. urban residency                                                                     | 0.1051    | 0.3170         | 0.1099          | 0.7403     |  |
| Cancer vs. non-cancer                                                                         | -0.1331   | 1.1270         | 0.0139          | 0.9060     |  |
| Primary palliative care vs. specialized palliative homecare                                   | 1.3126    | 0.5643         | 5.4107          | 0.0200     |  |
| Interaction cancer / non-cancer vs. primary palliative care / specialized palliative homecare | 0.6594    | 1.1655         | 0.3201          | 0.5715     |  |

13

14 **eTable 8b: Insertion or change of a PEG, 30 days**

| Analysis: maximum likelihood estimators, 30 days                                              |           |                |                 |            |  |
|-----------------------------------------------------------------------------------------------|-----------|----------------|-----------------|------------|--|
| Parameter                                                                                     | Estimator | Standard error | Wald Chi-square | Pr > ChiSq |  |
| Intercept                                                                                     | -3.1892   | 0.8759         | 13.2565         | 0.0003     |  |
| Age                                                                                           | -0.0370   | 0.0106         | 12.1877         | 0.0005     |  |
| Male vs. female sex                                                                           | 0.6621    | 0.2796         | 5.6095          | 0.0179     |  |
| Comorbidity index                                                                             | -0.00153  | 0.0384         | 0.0016          | 0.9682     |  |
| Nursing home resident vs. non-nursing home resident                                           | -0.1911   | 0.2942         | 0.4217          | 0.5161     |  |
| Rural vs. urban residency                                                                     | -0.1824   | 0.3031         | 0.3622          | 0.5473     |  |
| Cancer vs. non-cancer                                                                         | -10.9434  | 166.0          | 0.0043          | 0.9474     |  |
| Primary palliative care vs. specialized palliative homecare                                   | 0.9595    | 0.4386         | 4.7850          | 0.0287     |  |
| Interaction cancer / non-cancer vs. primary palliative care / specialized palliative homecare | 11.1859   | 166.0          | 0.0045          | 0.9463     |  |

15

16 **References**

17 References

- 18 1. Ditscheid B, Storch J, Krause M, et al. Leistungs- und Abrechnungsdatum in GKV-Routinedaten:  
 19 Umgang mit zeitlichen Abweichungen. *Gesundheitswesen* 2020; 82: S20-S28.
- 20 2. Langton JM, Blanch B, Drew AK, et al. Retrospective studies of end-of-life resource utilization and  
 21 costs in cancer care using health administrative data: a systematic review. *Palliative Medicine*  
 22 2014; 28: 1167–1196.
- 23 3. Schreye R de, Smets T, Annemans L, et al. Applying quality indicators for administrative databases  
 24 to evaluate end-of-life care for cancer patients in Belgium. *Health Aff (Millwood)* 2017; 36: 1234–  
 25 1243.
- 26 4. Radbruch L, Andersohn F and Walker J. Palliativversorgung: Überversorgung kurativ –  
 27 Unterversorgung palliativ? Analyse ausgewählter Behandlungen am Lebensende. Faktencheck  
 28 Gesundheit, Bertelsmann Stiftung, 2015.
- 29 5. Rochigneux P, Raoul JL, Beaussant Y, et al. Use of chemotherapy near the end of life: what factors  
 30 matter? *Ann Oncol* 2017; 28: 809–817.
- 31 6. Baumstarck K, Boyer L, Pauly V, et al. Use of artificial nutrition near the end of life: results from a  
 32 French national population-based study of hospitalized cancer patients. *Cancer Med* 2020; 9:  
 33 530–540.

34 **Abbreviations**

|        |                                                                                    |
|--------|------------------------------------------------------------------------------------|
| ATC    | Anatomical Therapeutic Chemical Code                                               |
| CCI    | Charlson Comorbidity Index                                                         |
| CI     | Confidence interval                                                                |
| EBM    | Uniform Value Scale                                                                |
| GOP    | Fee schedule items                                                                 |
| ICD    | International Statistical Classification of Diseases and Related Health Problems   |
| KV     | Associations of Statutory Health Insurance Physicians                              |
| MD     | Mean differences                                                                   |
| OPS    | German version of the international classification of procedures in medicine       |
| OR     | Odds ratio                                                                         |
| PEG    | Percutaneous endoscopic gastrostomy                                                |
| PP     | Change in percentage points                                                        |
| PZN    | Central Pharmaceutical Number                                                      |
| RECORD | Reporting of studies conducted using observational routinely-collected health data |
| SAS    | Software: Statistical Analysis System                                              |
| SD     | Standard deviation                                                                 |
| STROSA | Consensus German reporting standard for secondary data analyses                    |

35
